# Supplementary material for: How long is too long? Effects of loop size on G-quadruplex stability
Source: PubMed Central journal article supplement — Nucleic Acids Res. 2010 Jul 26;38(21):7858–68. doi: 10.1093/nar/gkq639 (PMC2995061; doi:10.1093/nar/gkq639), 2010-07-26
Supplement: supp_gkq639_GuedinSupInfo.pdf [file supp_gkq639_GuedinSupInfo.pdf]

# How long is too long ? Effects of loop size on G-quadruplex stability

Aurore Guédin<sup>1,2</sup>, Julien Gros<sup>2</sup>, Patrizia Alberti<sup>2</sup> & Jean-Louis Mergny<sup>1,2\*</sup>

## *Supplementary information*

<sup>1</sup> INSERM, U869, European Institute of Chemistry and Biology, Bordeaux 2 University, 2 rue Robert Escarpit, Pessac F-33607, France.

<sup>2</sup> INSERM, U565, Acides nucléiques: dynamique, ciblage et fonctions biologiques, Muséum National d'Histoire Naturelle (MNHN) USM503, CNRS, UMR7196, Département de "Régulations, développement et diversité moléculaire", 43 rue Cuvier, CP26, Paris Cedex 5, F-75231, France.

### ***Figures S1-S8: TDS, CD and UV melting experiments.***

Each figure corresponds to a different series. The sequences were tested at 4  $\mu$ M strand concentration. All figures followed the same convention: left panels in 100 mM KCl; Right panels in 100 mM NaCl. Both buffers contained 10 mM lithium cacodylate at pH 7.2.

**a-b) Thermal difference spectra.** Thermal difference spectra result from the difference between the absorbance recorded at  $88 \pm 2$  °C and at  $04 \pm 2$  °C. They were recorded over the 220-335 nm wavelength range.

**c-d) Circular dichroism spectra.** (available for all but 2 series) CD spectra were recorded at 10-25°C (in K<sup>+</sup>) or 4-25°C in Na<sup>+</sup> (to maximize quadruplex formation in the case of relatively unstable quadruplexes) on a JASCO-810 spectropolarimeter using 1 cm path length quartz cuvettes. Oligonucleotides were prepared as a 4  $\mu$ M and annealed by heating to 90°C for 2 min, followed by slow cooling.

**e-f) UV melting profiles** Absorbance at 295 nm is plotted as a function of temperature.

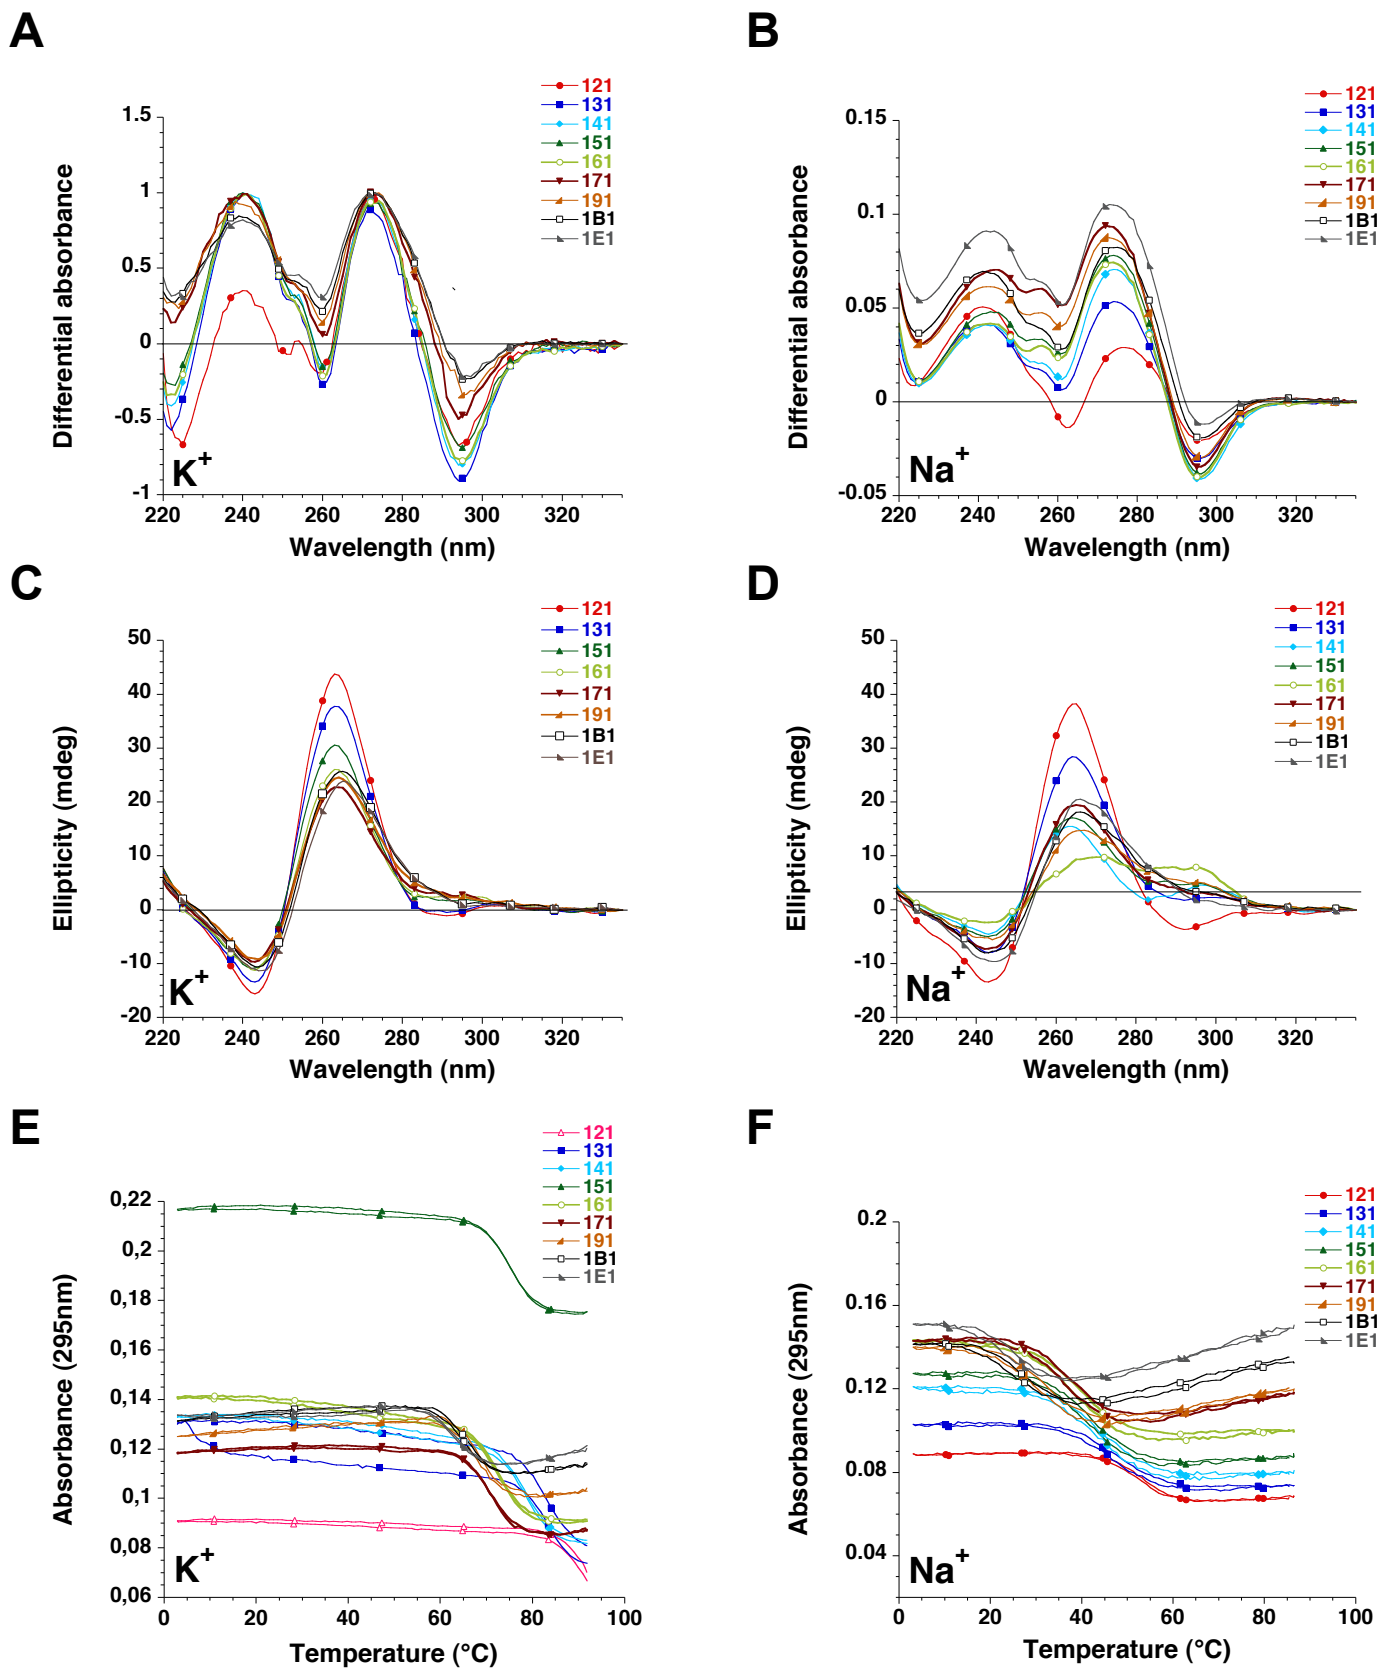

Figure S1

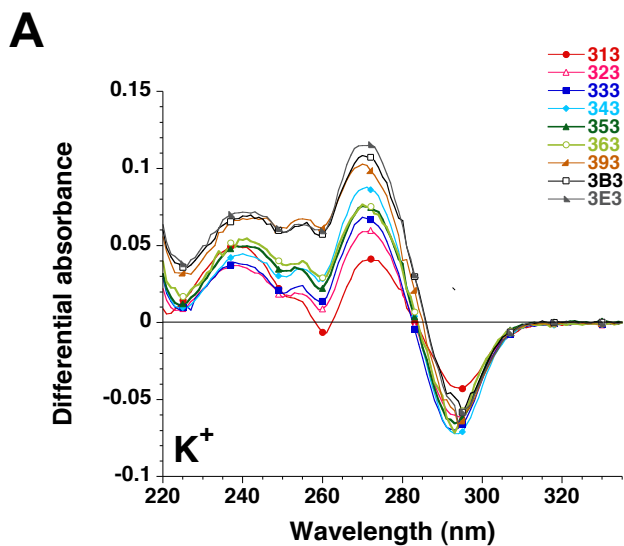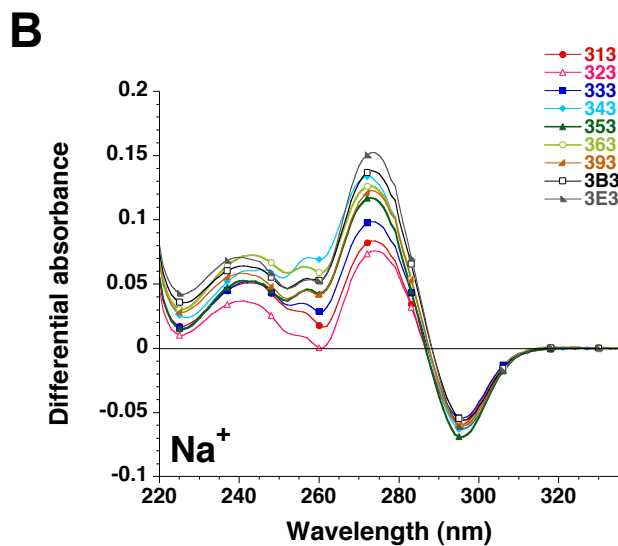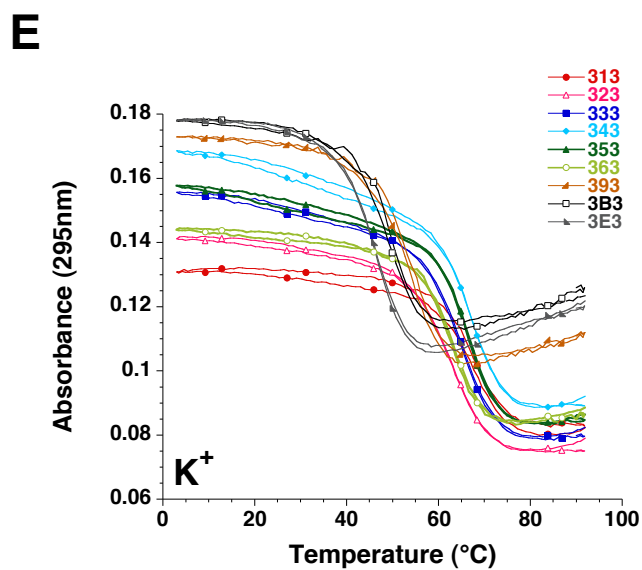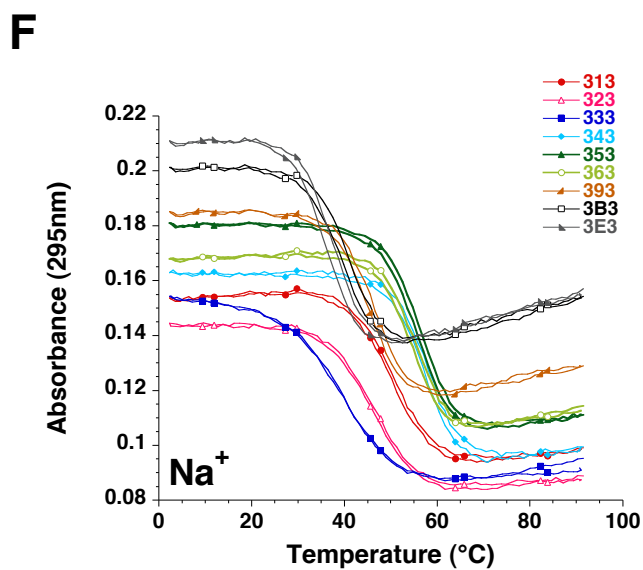

Figure S2

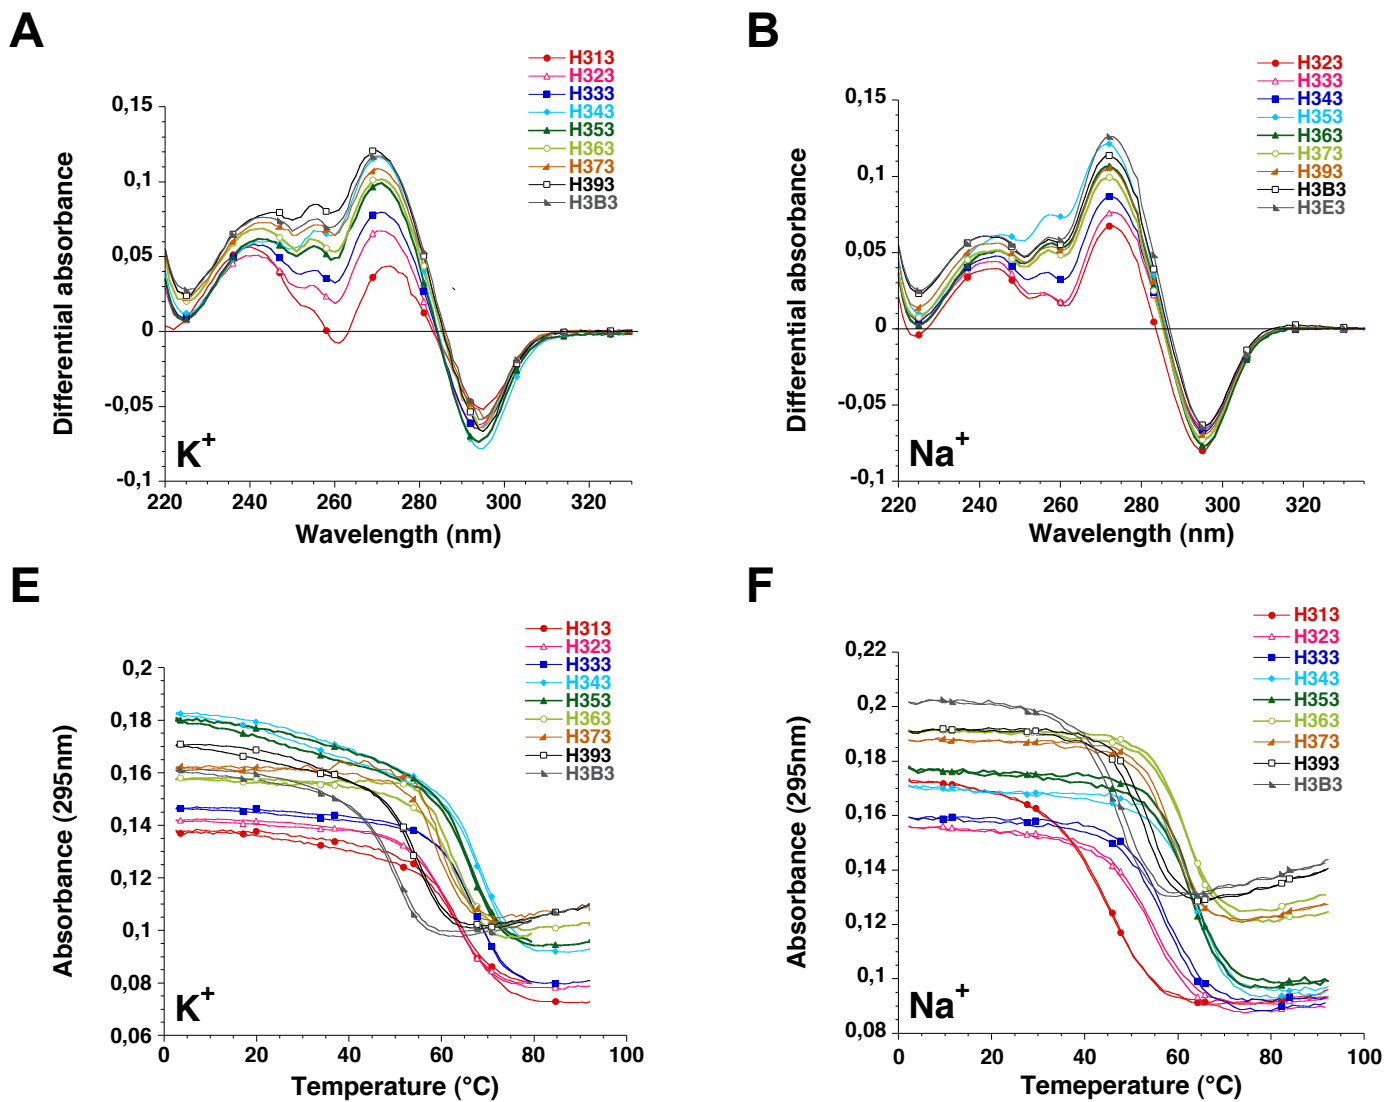

Figure S3

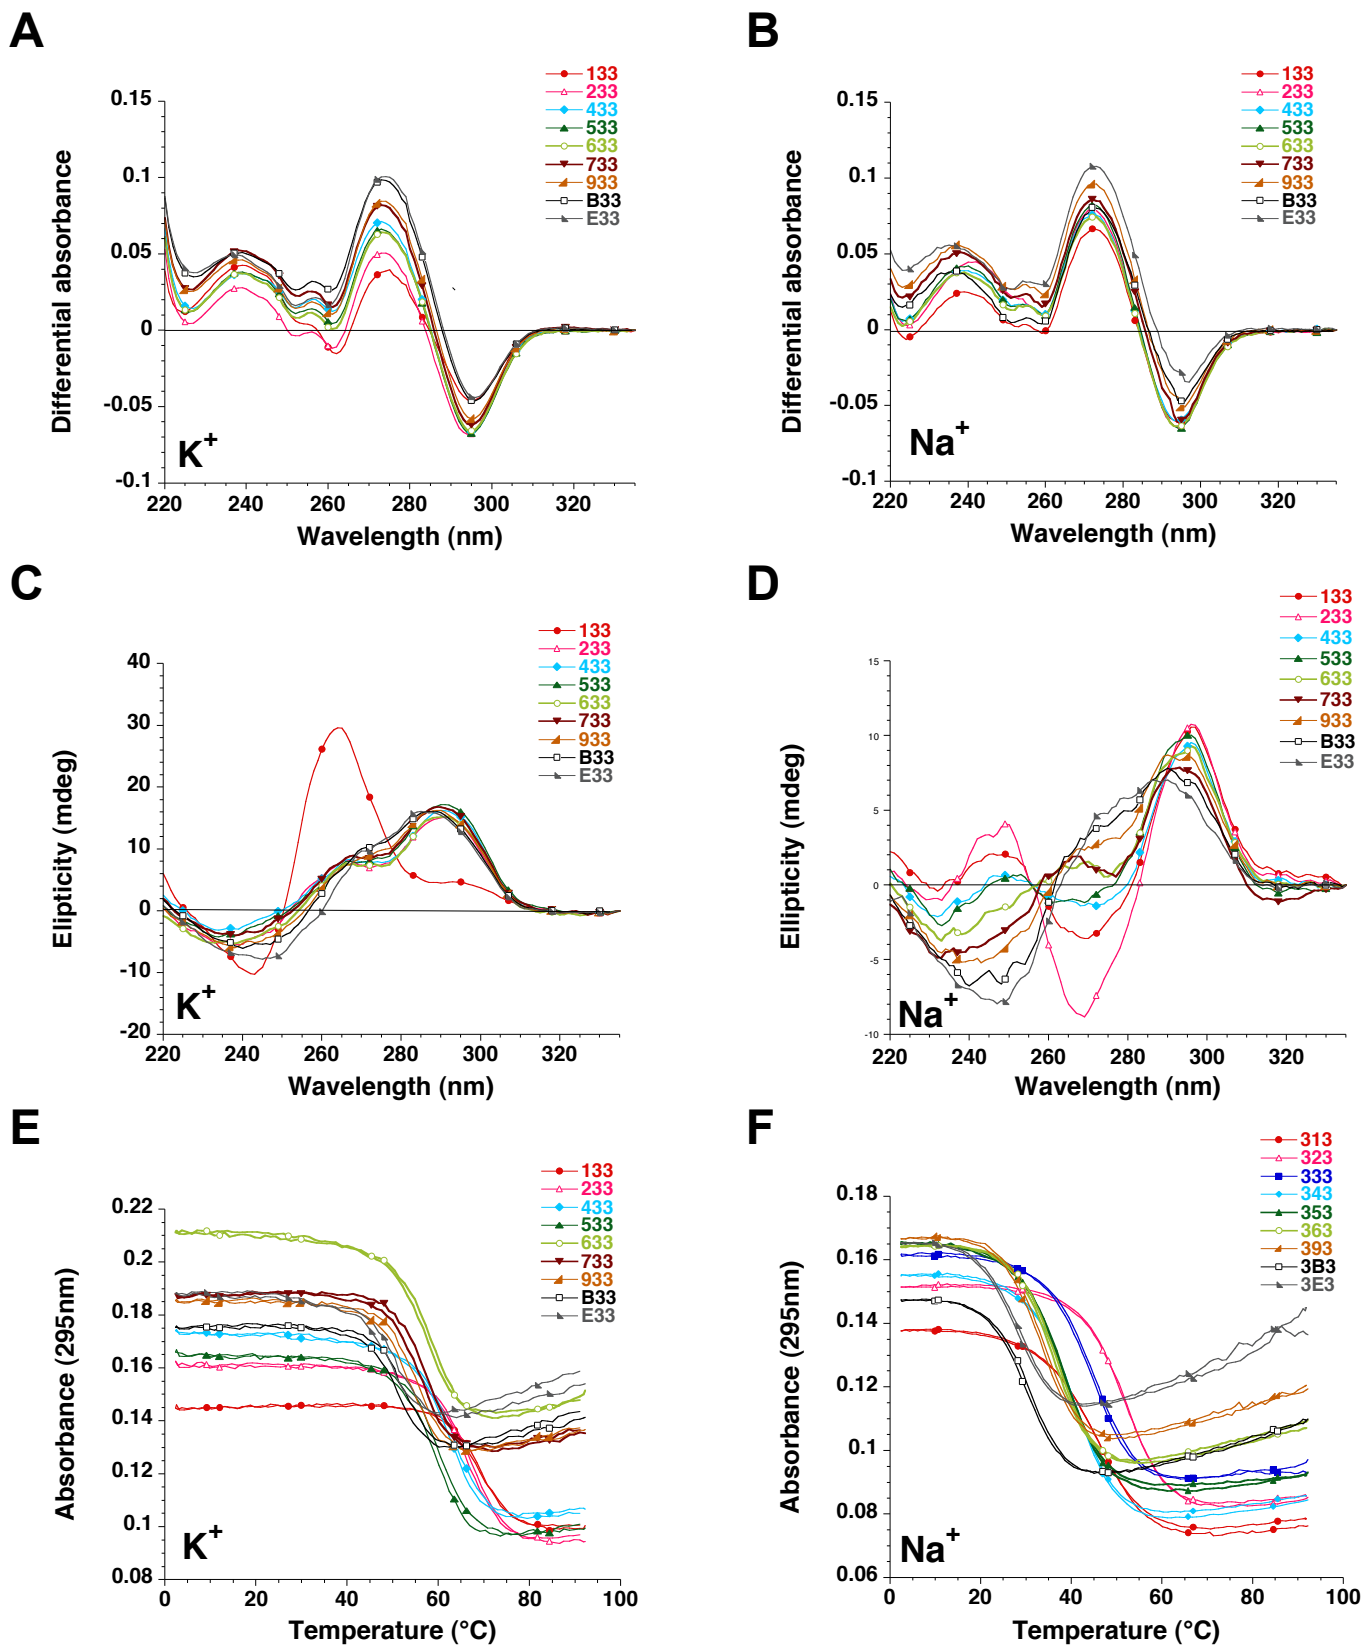

Figure S4

**A**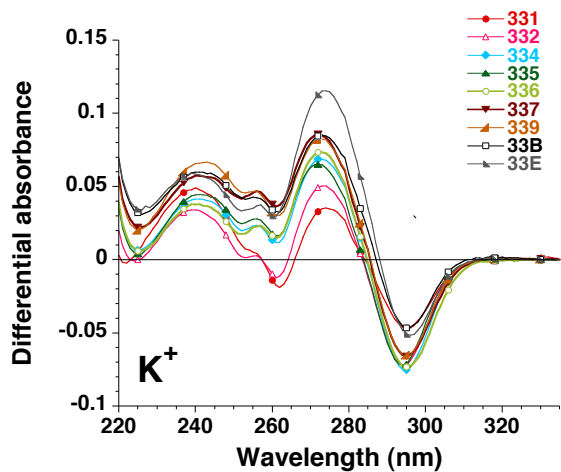**B**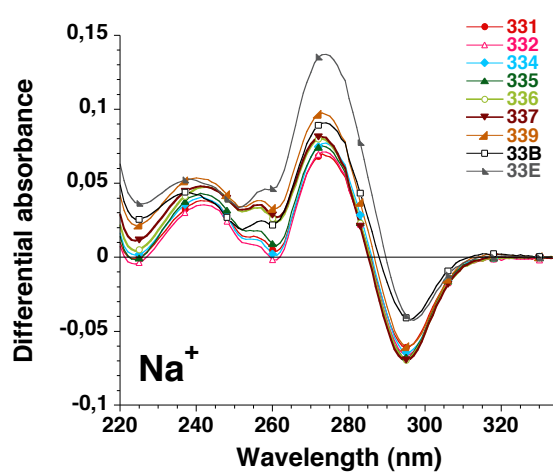**C**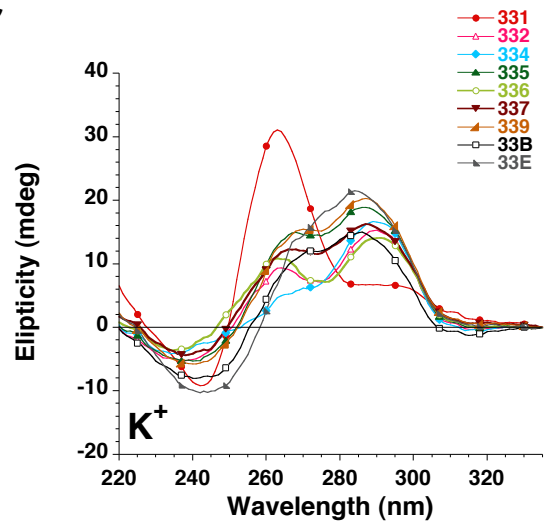**D**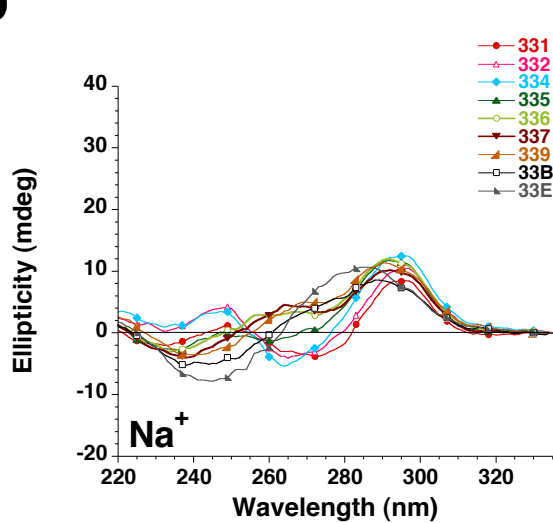**E**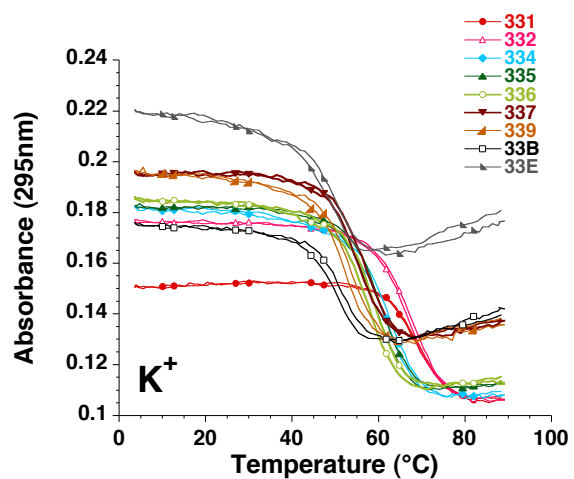**F**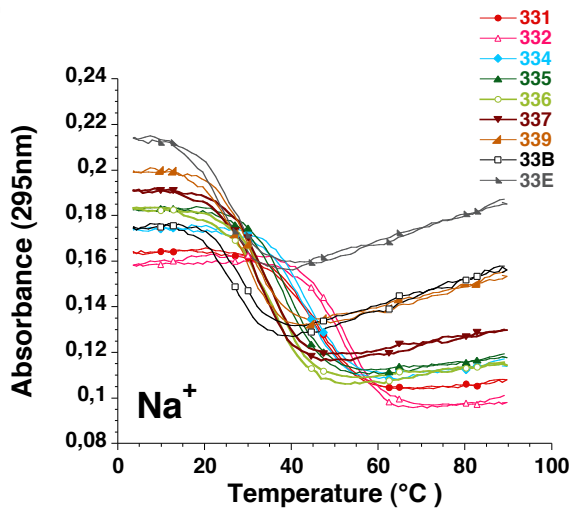

Figure S5

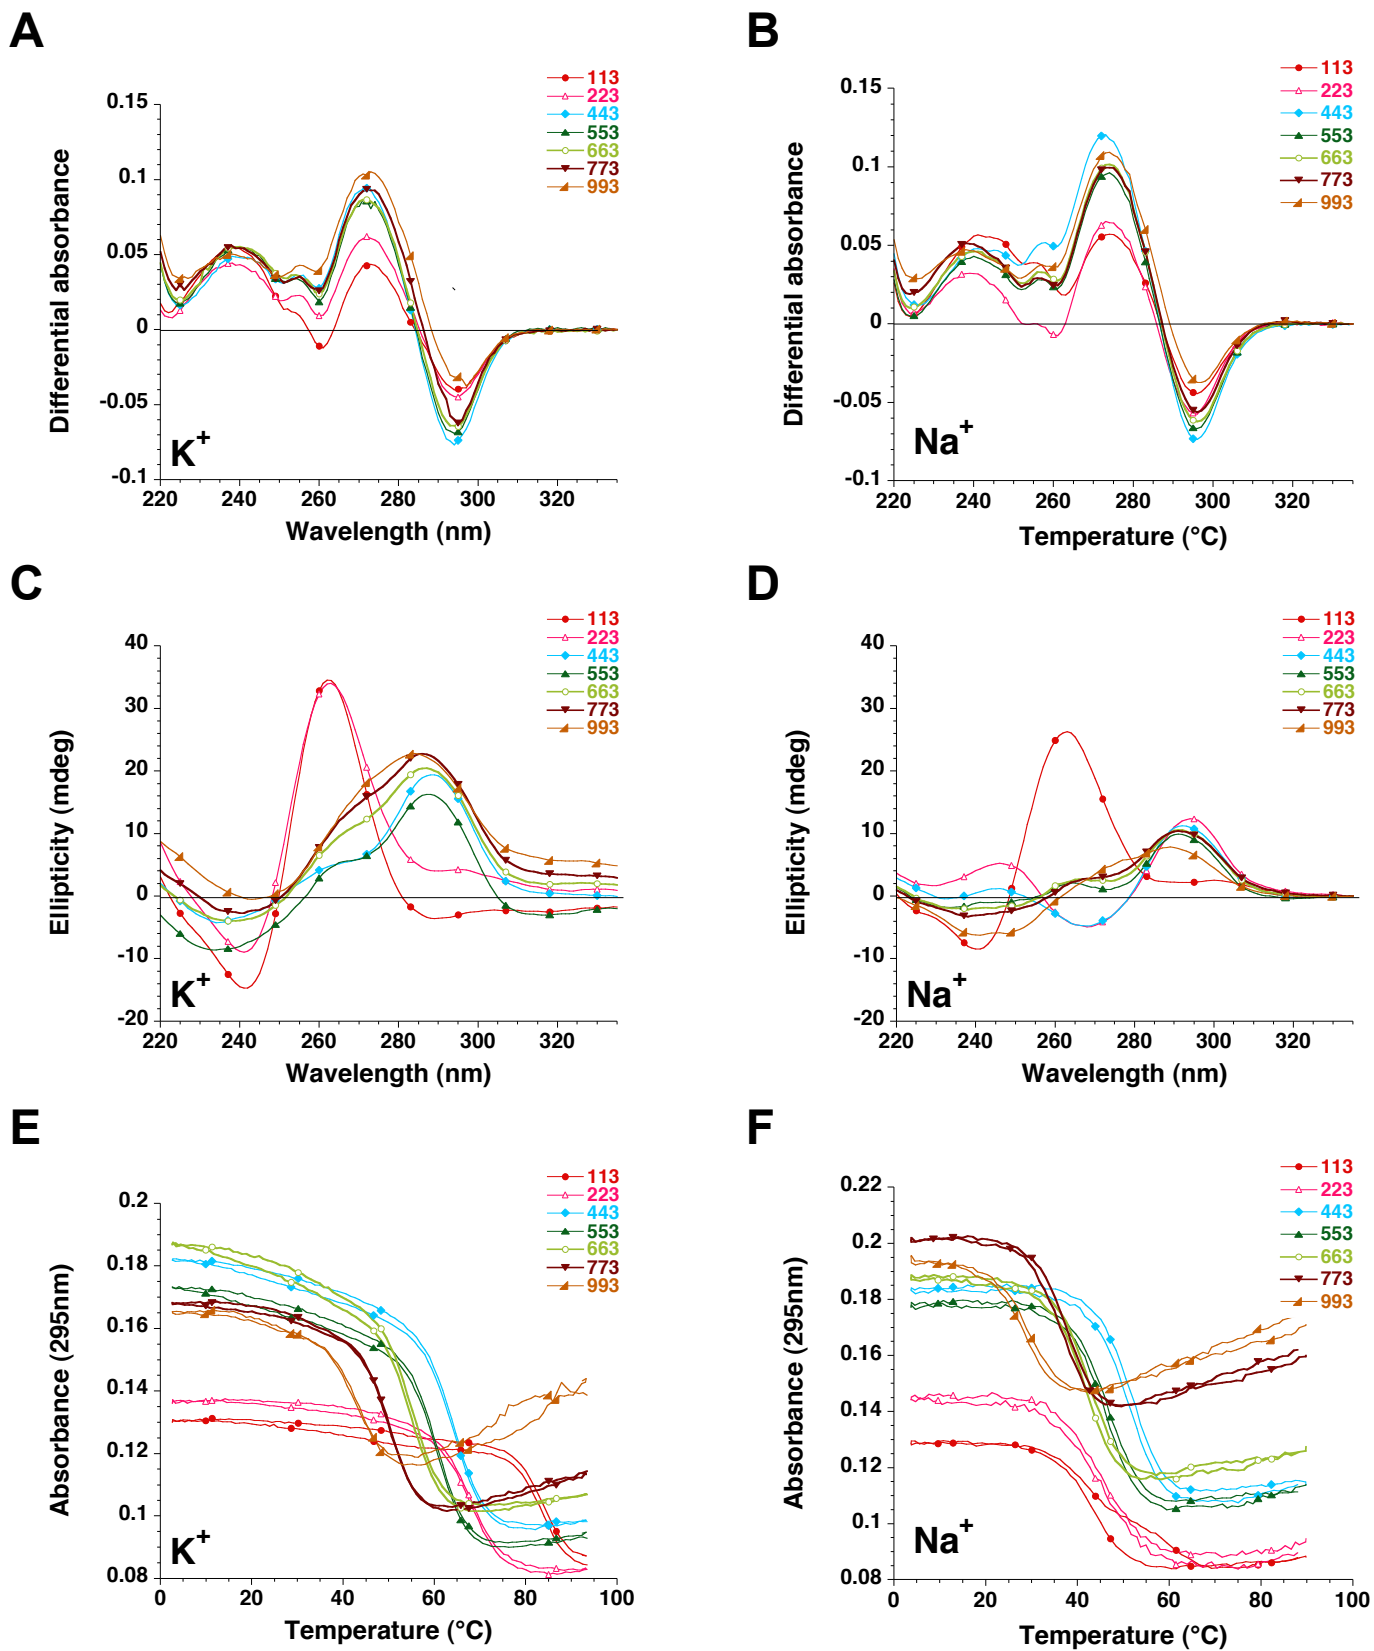

Figure S6

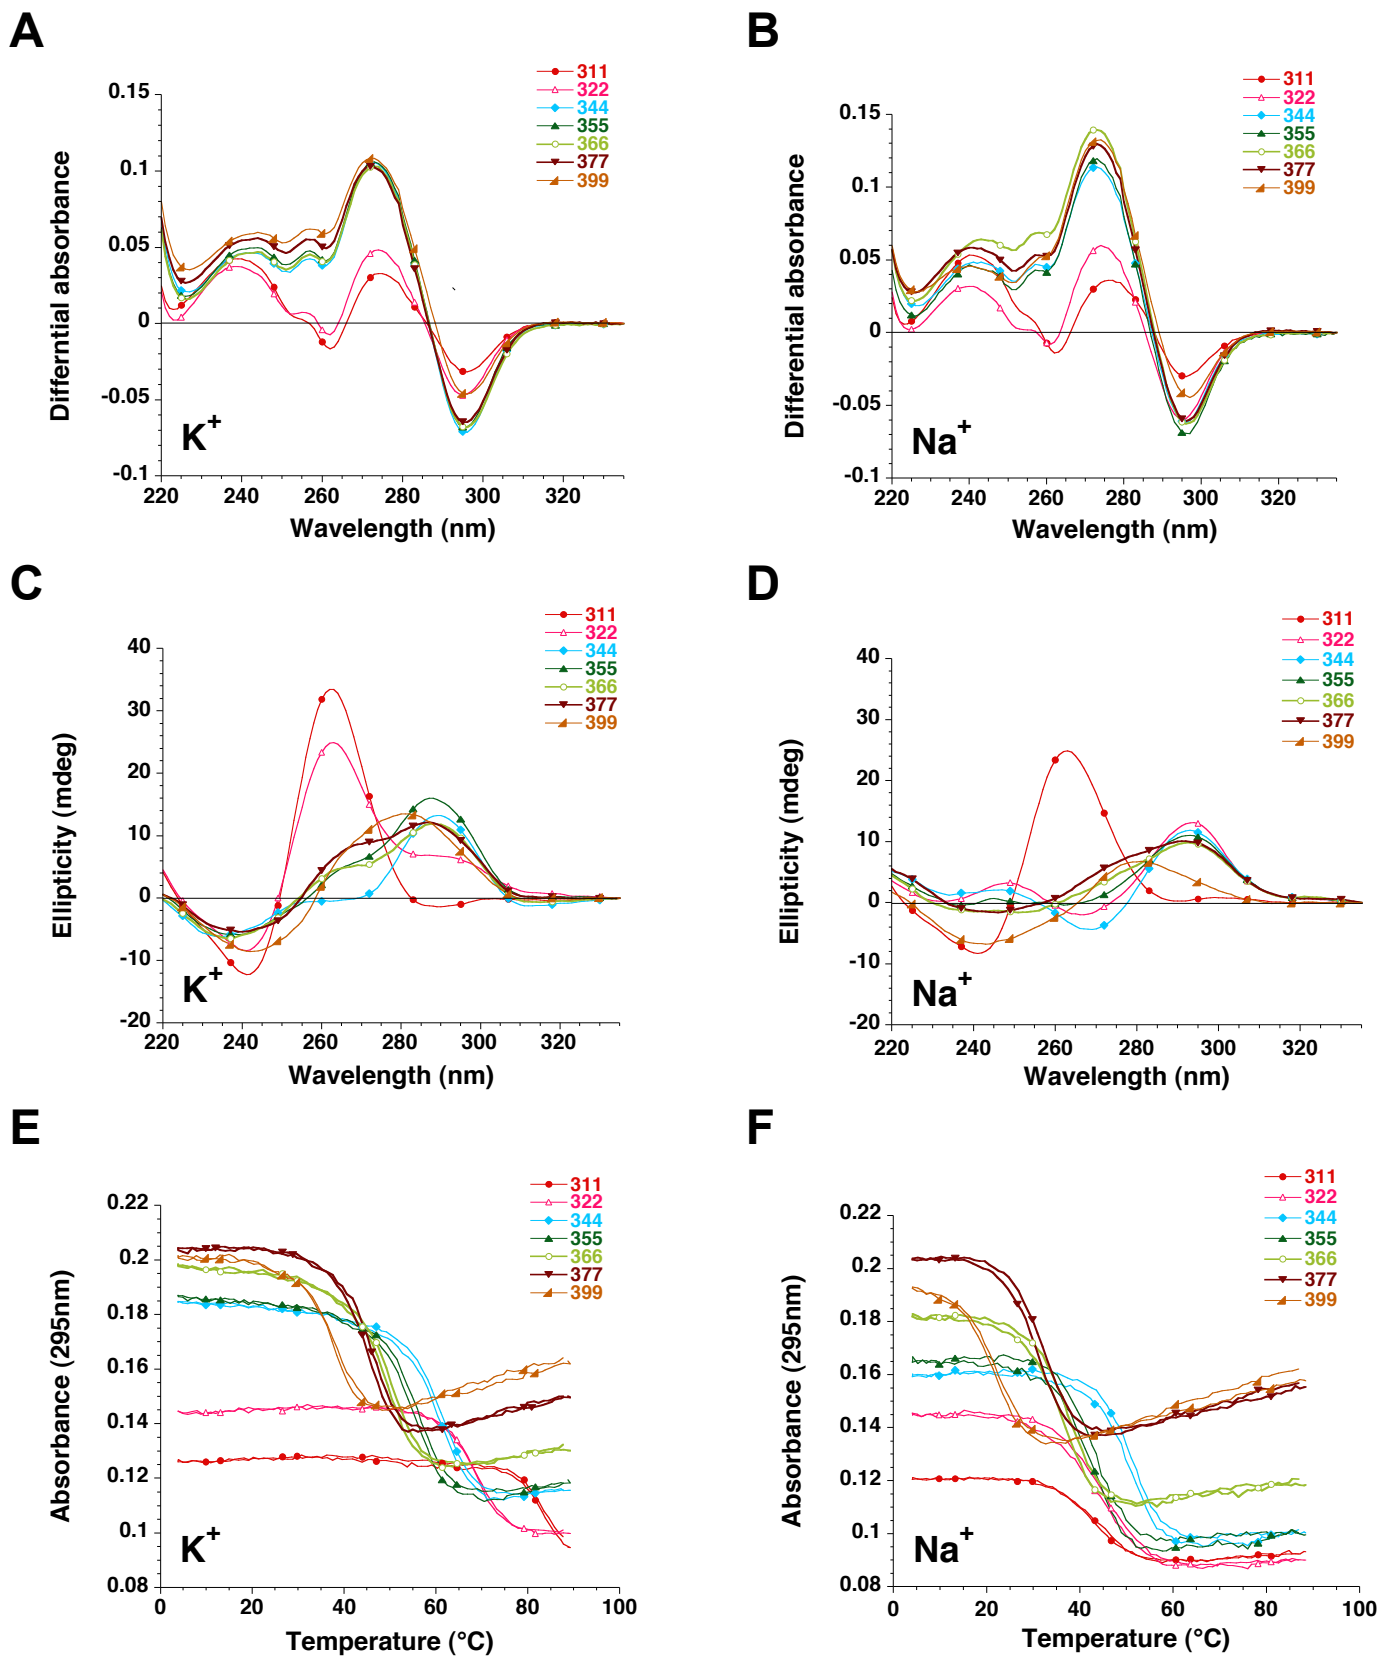

Figure S7



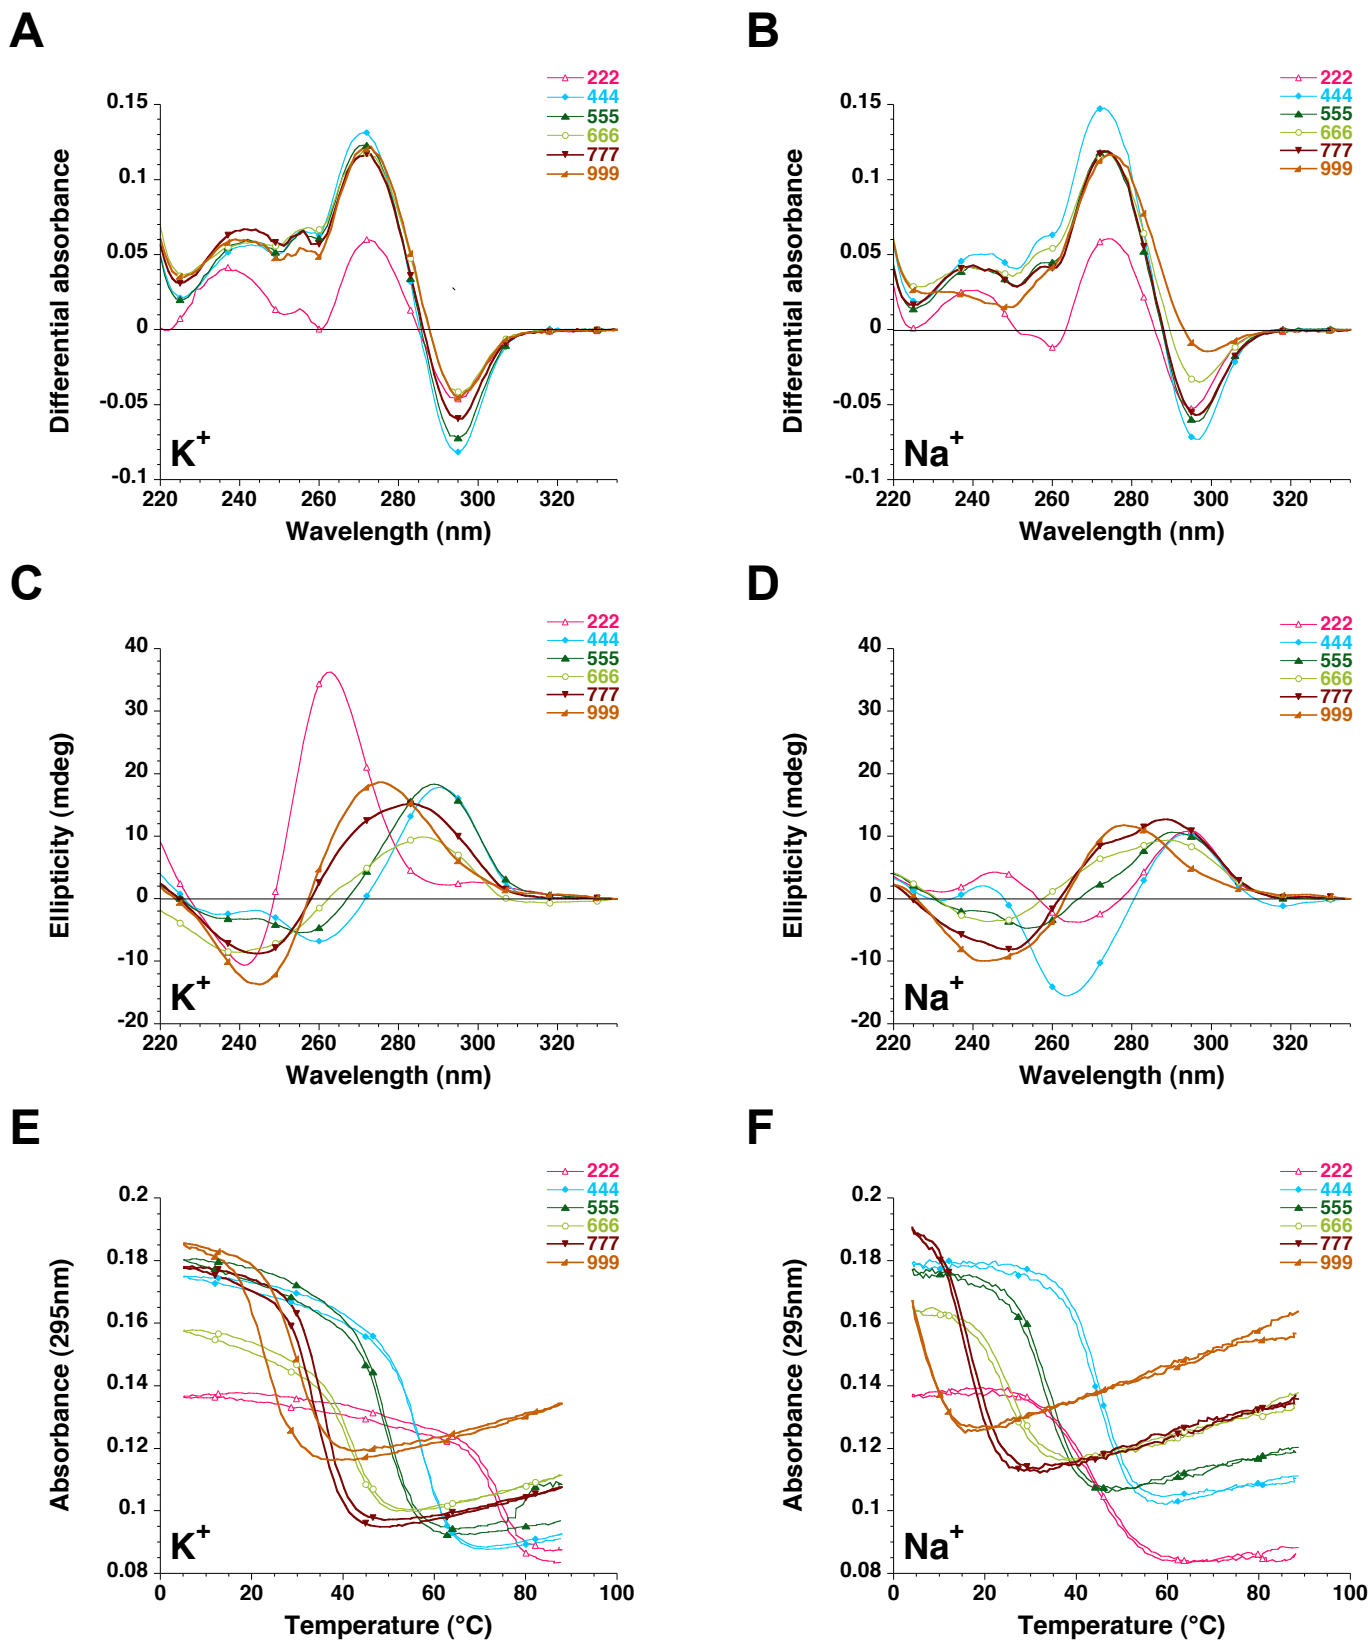

Figure S8
